# Supplementary material for: Hyperglycemia, Type 2 Diabetes, and Depressive Symptoms: The British Whitehall II study
Source: PubMed Central journal article supplement — Diabetes Care. 2009 Jul 10;32(10):1867–9. doi: 10.2337/dc09-0716 (PMC2752923; doi:10.2337/dc09-0716), 2009-07-10
Supplement: supp_dc09-0716_OnlineAppendix.pdf [file supp_dc09-0716_OnlineAppendix.pdf]

**Online Appendix Table A1: Linear Regression Analysis of the Association Between Glycaemic Indices and Depressive Symptoms (CES-D Score) in the Total Cohort and Subgroups**

| Glycaemic index<br>Predictors* | Beta coefficient (standard error) for CES-D score |                        |                        |                        |                      |                        |
|--------------------------------|---------------------------------------------------|------------------------|------------------------|------------------------|----------------------|------------------------|
|                                | All                                               | Men                    | Women                  | White                  | Non-white            | All (repeat measures)† |
| <b>Fasting glucose</b>         |                                                   |                        |                        |                        |                      |                        |
| Age                            | -0.09 (0.02), p<0.0001                            | -0.11 (0.02), p<0.0001 | -0.03 (0.04), p=0.49   | -0.10 (0.02), p<0.0001 | 0.01 (0.08), p=0.89  | -0.08 (0.02), p<0.0001 |
| Sex                            | 1.93 (0.24), p<0.0001                             | —                      | —                      | 1.90 (0.24), p<0.0001  | 2.51 (0.92), p=0.007 | 1.95 (0.25), p<0.0001  |
| Ethnicity                      | -3.32 (0.40), p<0.0001                            | -3.17 (0.50), p<0.0001 | -3.57 (0.70), p<0.0001 | —                      | —                    | -3.30 (0.42), p<0.0001 |
| fGluc                          | -1.11 (0.41), p=0.007                             | -0.86 (0.47), p<0.0001 | -1.67 (0.84), p=0.05   | -0.84 (0.45), p=0.06   | -2.12 (1.23), p=0.09 | -2.89 (1.09), p=0.008  |
| fGluc squared‡                 | 0.08 (0.03), p=0.001                              | 0.06 (0.03), p=0.04    | 0.13 (0.05), p=0.01    | 0.06 (0.02), p=0.03    | 0.15 (0.07), p=0.03  | 0.24 (0.09), p=0.01    |
|                                | n = 3986                                          | n = 2924               | n = 1062               | n = 3704               | n = 282              | n = 3763               |
| <b>Postload glucose</b>        |                                                   |                        |                        |                        |                      |                        |
| Age                            | -0.11 (0.02), p<0.0001                            | -0.12 (0.02), p<0.0001 | -0.07 (0.04), p=0.09   | -0.11 (0.02), p<0.0001 | -0.03 (0.09), p=0.70 | -0.10 (0.02), p<0.0001 |
| Sex                            | 2.05 (0.25), p<0.0001                             | —                      | —                      | 2.01 (0.26), p<0.0001  | 2.70 (0.99), p=0.007 | 2.29 (0.26), p<0.0001  |
| Ethnicity                      | -3.18 (0.43), p<0.0001                            | -3.03 (0.53), p<0.0001 | -3.36 (0.78), p<0.0001 | —                      | —                    | -0.65 (0.29), p=0.03   |
| 2hGluc                         | -0.20 (0.16), p=0.20                              | -0.29 (0.16), p=0.07   | -0.21 (0.53), p=0.69   | -0.10 (0.17), p=0.56   | -0.83 (0.51), p=0.11 | -0.65 (0.29), p=0.03   |
| 2hGluc squared‡                | 0.02 (0.01), p=0.049                              | 0.02 (0.01), p=0.03    | 0.03 (0.03), p=0.36    | 0.02 (0.01), p=0.25    | 0.04 (0.02), p=0.06  | 0.05 (0.02), p=0.01    |
|                                | n = 3455                                          | n = 2580               | n = 875                | n = 3220               | n = 235              | n = 3146               |
| <b>HbA1c</b>                   |                                                   |                        |                        |                        |                      |                        |
| Age                            | -0.09 (0.02), p<0.0001                            | -0.12 (0.02), p<0.0001 | -0.02 (0.04), p=0.55   | -0.10 (0.02), p<0.0001 | -0.02 (0.08), p=0.82 | Data not available     |
| Sex                            | 2.10 (0.23), p<0.0001                             | —                      | —                      | 2.04 (0.24), p<0.0001  | 2.91 (0.89), p=0.001 |                        |
| Ethnicity                      | -3.07 (0.39), p<0.0001                            | -2.89 (0.48), p<0.0001 | -3.34 (0.70), p<0.0001 | —                      | —                    |                        |
| HbA1c                          | -1.12 (0.84), p=0.19                              | -0.70 (1.02), p=0.49   | -1.38 (1.56), p=0.38   | -0.42 (0.97), p=0.67   | -3.79 (2.27), p=0.10 |                        |
| HbA1c squared‡                 | 0.13 (0.06), p=0.04                               | 0.09 (0.08), p=0.27    | 0.18 (0.11), p=0.12    | 0.08 (0.07), p=0.30    | 0.31 (0.16), p=0.047 |                        |
|                                | n = 4160                                          | n = 3046               | n = 1114               | n = 3849               | n = 311              |                        |

\*Age in years, sex (1=men, 2=women), ethnicity (1=White, 0=non-White), fasting glucose and 2-hour postload glucose in mmol/L, HbA1c in percentages.

†Analysis is based on average glucose levels in 1997/1999 and 2003/2004. CES-D was measured in 2003/2004.

‡This parameter tests curvilinear trend (the U-shape).
